## A new species of *Silene* (Caryophyllaceae) from east Anatolia, Turkey

OSMAN TUGAY\* and KUDDISI ERTUĞRUL

Department of Biology, Faculty of Science and Literature, Selçuk University, 42075 Konya, Turkey

Received 6 July 2005; accepted for publication 23 October 2007

*Silene bitlisensis* O.Tugay & Ertugrul from the Green Line Afforestation Zone (B9: Bitlis Province) is a new species described and illustrated here. It is closely related to *S. caramanica* Boiss. & Heldr. var. *ilarslanii* Aytaç & Dural, from which it mainly differs in its habit, leaf, and floral features. © 2008 The Linnean Society of London, *Botanical Journal of the Linnean Society*, 2008, 156, 463–466.

ADDITIONAL KEYWORDS: Bitlis – Irano-Turanian – *Sclerocalycinae* – taxonomy.

### INTRODUCTION

*Silene* contains almost 700 species, about one-half of which grow in the Mediterranean area. The South Balkan Peninsula and south-west Asia are the two main centres of diversity of the genus (Greuter, 1995). *Silene* is the largest genus of the Caryophyllaceae in Turkey. Since the revision of *Silene* for the *Flora of Turkey and the East Aegean Islands* (Coode & Cullen, 1967), 19 new species have been described from Anatolia (Davis, Mill & Tan, 1988; Tan & Vural, 2000; Vural & Dönmez, 2002; Duran & Menemen, 2003; Aytaç & Duman, 2004; Deniz & Düşen, 2004). Currently, 138 species of *Silene* are known to occur in Turkey.

Turkey has a rich flora which is still relatively unknown, with many species yet to be described, as shown by recent papers in this journal (for example, Akpulat & Çelik, 2007; Çelik, Askin & Dönmez, 2007; Doğan & Akaydin, 2007; Dönmez, 2007; Sağıroğlu & Duman, 2007; Uysal *et al.*, 2007). *Silene* L. is no exception.

During a project for the revision of the genus *Consolida* Gray in Turkey, undertaken in the summer of 2003, some interesting plant specimens were collected by the authors from the Green Line Afforestation Zone (Bitlis, Turkey). One of the specimens belonged to the genus *Silene* L. These specimens had very striking anthophores. They were compared with

many specimens of supposedly related species in the herbaria KNYA, ADO, ANK, and GAZI, and with records in references (Chater & Walters, 1964; Zohary, 1966a, b; Coode & Cullen, 1967; Täckholm, 1974; Meikle, 1977; Davis *et al.*, 1988; Greuter, 1995, 1997; Vural & Adıgüzel, 1996; Aytaç, 1998; Tan & Vural, 2000; Vural & Dönmez, 2002; Duran & Menemen, 2003; Aytaç & Duman, 2004; Deniz & Düşen, 2004).

Specimens of *S. caramanica* Boiss. & Heldr. var. *caramanica* and var. *ilarslanii* Aytaç & Dural, *S. bupleroides* L. ssp. *staticifolia* (Sibth. & Sm.) Chowdh., and *S. doganii* A.Duran & Y.Menemen were examined in the herbaria KNYA, ADO, ANK, and GAZI for this study. It was shown that some of these specimens were representatives of a species new to science (Fig. 1) belonging to section *Sclerocalycinae* Boiss. A map is provided (Fig. 2) showing the distribution of *S. bitlisensis* O.Tugay & Ertugrul, *S. caramanica* var. *ilarslanii*, *S. bupleroides* ssp. *staticifolia*, and *S. doganii* based on the localities in which specimens were found and the citations of Coode & Cullen (1967).

### SPECIES DESCRIPTION

***SILENE BITLISENSIS*** O.TUGAY & ERTUĞRUL,  
SP. NOV. (FIG. 1)

*Type:* Turkey. B9 Bitlis: Green Line Afforestation Zone, 1680 m, 38°26.370'N, 42°08.620'E, 4.vii.2003, *Ertugrul 2927* & *O.Tugay* (holotype: KNYA; isotypes: GAZI, ANK, K).

\*Corresponding author. E-mail: otugay@selcuk.edu.tr

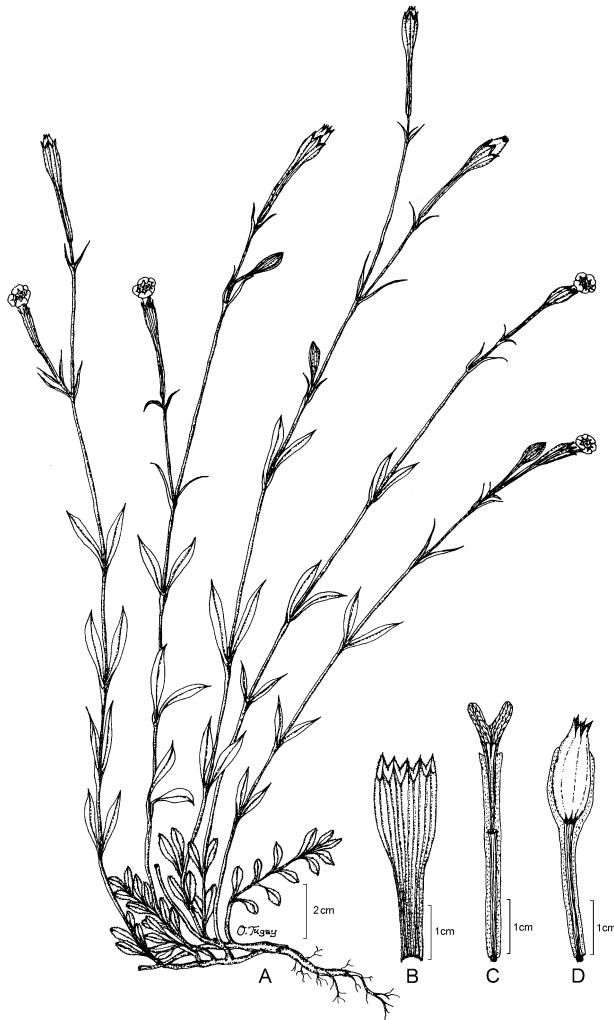

**Figure 1.** *Silene bitlisensis* O.Tugay & Ertugrul: A, habit; B, calyx; C, petal and anthophore; D, capsule and anthophore.

**Diagnosis:** Plantae 20–45 cm altae, herbaceae, perennes. Folia basalia 10–18 × 3–4 mm, spathulato-oblancoelata. Calyces 33–40 mm longi. Petala cremeo-colourata. Anthophora glabra, 25–28 mm longa.

**Description:** Loosely tufted herbaceous perennial with short vegetative shoots. Flowering stems 20–45 cm, terete, 1–1.5 mm in diameter, glabrous, glaucous, not viscid, much branched from the base. Leaves dimorphic. Basal leaves spathulate-oblancoelate, 10–18 × 3–4 mm (including petiole), glabrous, with minutely ciliate margin, acuminate; young leaves green, older straw-coloured. Cauline leaves gradually decreasing towards inflorescence, 18–30 × 2–5 mm; lower and middle cauline leaves oblancoelate-elliptic, acuminate, wholly glabrous, glaucous green. Upper cauline leaves narrowly lan-

ceolate to subulate. Nodes swollen; internodes 2–3 cm below, up to 7 cm above. Inflorescence a reduced cyme or with one to two flowers only, glabrous. Bracts 6–10 mm, subulate, not viscid, glabrous, with scarious, minutely ciliate margin. Pedicels 4–12 mm, glabrous. Calyx 33–40 mm, glabrous, glaucous; 10-nerved; teeth 2–3 mm, triangular-acute to acuminate, minutely ciliolate-villous with scarious margin. Petals 28–30 mm, cream, light green when dry; limb 16–20 mm, deeply bifid; lobes 7–8 mm, ±oblong; coronal scales present, auriculate, 1.5–2 mm; staminal filaments glabrous; styles 3. Capsule immature, ±oblong, exceeding calyx, 16–18 × 5–6 mm. Anthophore glabrous, 25–28 mm. Flowers 6–7. Stony slopes, 1650–1700 m.

**Specimens examined:** *Silene caramanica* var. *ilarslanii*; C5 Konya: Ereğli, Aydos Dağı, Aktoprak, 1700 m, 28.viii.1973, *Erik 2614* (HUB). C4 Konya: Karaman, Kızılyaka, Karatepe, 1600 m, 29.vii.1984, *M.Serin 1500* (KNYA); Antalya: Gündoğmuş, Geyik Dağı, 2300–2500 m, *Dural 3916 & İlarslan* (GAZI). C3 Antalya: Akseki, Çukurköy Y. Hacıbeyin Eşmesi, 2000 m, 5.vii.1996, *A.Duran 4090* (GAZI); Antalya: Akseki, Çukurköy Y., Toptaş mevkii, 2050 m, 6.vii.1996, *A.Duran 4097* (GAZI). *Silene bupleuroides* L. ssp. *staticifolia* (Sibth. & Sm.) Chowdh.; Turkey. B1 Manisa: M. Sipylos Magnesiae [Manisa Da.] in fruticetis summi cacuminis, solo calcarea, c. 1800–1900 m, 13.viii.1933, *O.Schwarz 1017* (holotype of *S. sipylea* O.Schwarz. B, photo. ADO!). B3 Konya: Akşehir, Cankurtaran, Sultan dağları, 1800 m, 9.vii.1986, *Y.Akman 14164* (ANK). *Silene caramanica* var. *caramanica*; C4 Konya: Karapınar, Karacadağ, Durantepe, 1450 m, 23.vi.1982 *H.Dural 1186* (KNYA). *Silene doganii*: C6 Osmaniye: Amanos Dağları, Zorkun Yaylası, Keldazı tepesi, 1750 m, 36°58.95'N, 36°24.22'E, 5.vii.2001, *A.Duran 5759 & Y.Menemen* (holotype: ADO; isotypes: ANK, GAZI, HUB).

**Distribution and suggested conservation status:** *Silene bitlisensis* is an endemic species known only from the type gathering in east Anatolia (Bitlis Province), and is an Irano-Turanian element. This species must be classified as critically endangered (CR) according to the World Conservation Union (IUCN) categories (IUCN, 2001).

**Ecology:** *Silene bitlisensis* grows on stony slopes at 1650–1700 m with *Grammosciadium pterocarpum* Boiss., *Helichrysum graveolens* (Bieb.) Sweet, *H. plicatum* DC. ssp. *plicatum*, *Inula heterolepis* Boiss., *Alkanna froedinii* Rech.fil., *Onosma procerum* Boiss., *Paracaryum strictum* (C.Koch) Boiss., *Rindera lanata* (Lam.) Bunge var. *canescens* (A.DC.) Kusn., *Aethionema membranaceum* DC., *Onobrychis stenostachya*

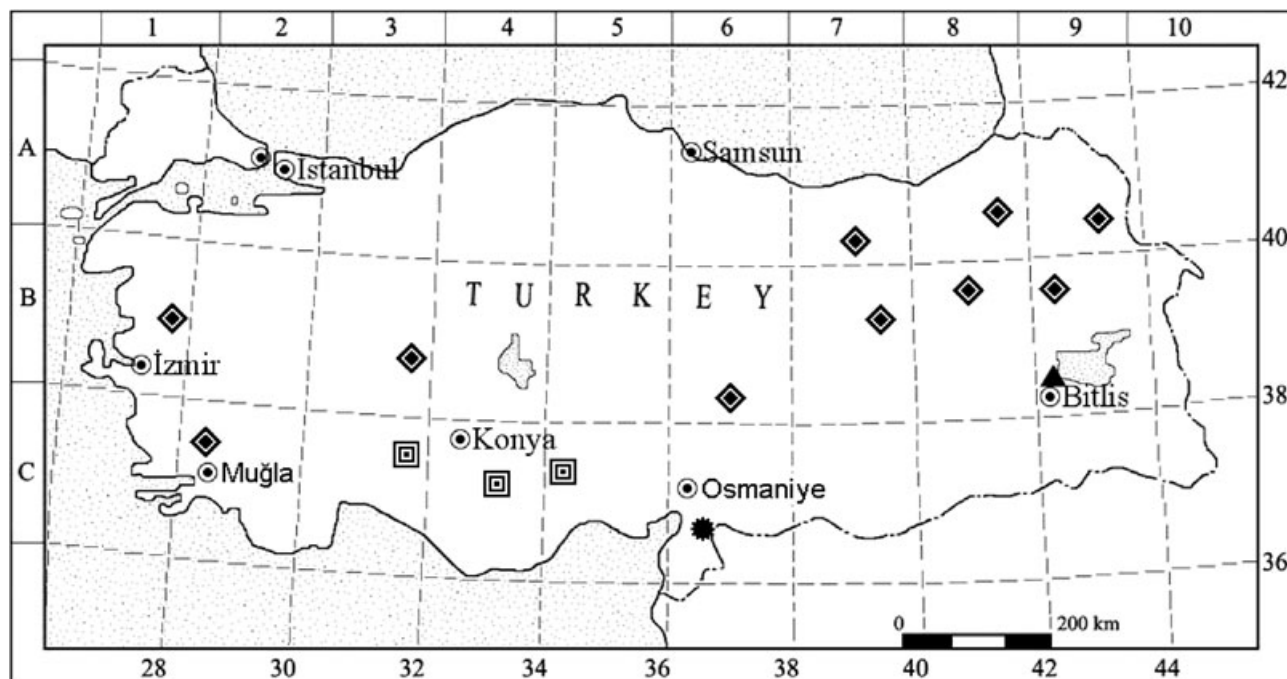

**Figure 2.** Distribution map of *Silene bitlisensis* O.Tugay & Ertugrul (▲), *S. caramanica* Boiss. & Heldr. var. *ilarslanii* Aytac & Dural (◻), *S. bupleuroides* L. ssp. *staticifolia* (Sibth. & Sm.) Chowdh., (◆) and *S. doganii* A.Duran & Y.Menemen (★) in Turkey.

**Table 1.** Diagnostic characters of *Silene bitlisensis* O.Tugay & Ertugrul, *S. bupleuroides* L. ssp. *staticifolia* (Sibth. & Sm.) Chowdh., and *S. caramanica* Boiss. & Heldr. var. *ilarslanii* Aytac & Dural

| Character                          | <i>S. bitlisensis</i>                               | <i>S. caramanica</i><br>var. <i>ilarslanii</i> | <i>S. bupleuroides</i><br>ssp. <i>staticifolia</i> |
|------------------------------------|-----------------------------------------------------|------------------------------------------------|----------------------------------------------------|
| Basal leaves                       | Spathulate-ob lanceolate,<br>10–18 × 3–4 mm         | Linear-lanceolate,<br>30–60 × 4–8 mm           | Oblanceolate-linear,<br>20–40 × 2–5 mm             |
| Lower and middle<br>cauline leaves | Oblanceolate-elliptic, acuminate,<br>18–30 × 2–5 mm | Linear-lanceolate, acute,<br>20–60 × 5–8 mm    | Linear-lanceolate, acute,<br>10–15 × 1–2 mm        |
| Bracts                             | Subulate                                            | Linear-lanceolate                              | Ovate                                              |
| Calyx                              | 33–40 mm long,<br>teeth 2–3 mm long                 | 22–30 mm long,<br>teeth 5–6 mm long            | 20–28 mm long,<br>teeth 1–2 mm long                |
| Petals                             | Cream, 28–30 mm long                                | Ivory white, 26–33 mm long                     | White, 17–24 mm long                               |
| Anthophore                         | 25–28 mm long                                       | 10–15 mm long                                  | 10–18 mm long                                      |

Freyn ssp. *krausei* (Sirj.) Hedge, *Globularia trichosantha* Fisch. & Mey., and *Linaria simplex* (Willd.) DC.

## DISCUSSION AND CONCLUSION

*Silene bitlisensis* is closely allied to three taxa: *S. bupleuroides* ssp. *staticifolia*, *S. caramanica* var. *ilarslanii*, and *S. doganii*.

*Silene bitlisensis* is included in the section *Sclerocalycinae* Boiss., in which all taxa have large flowers and calyx glabrous, rather firm in texture, smooth, the veins usually rather obscure. The anthophores of

*S. bitlisensis* are conspicuously long, which separates it easily from the other species of the section.

*Silene bitlisensis* is closely related to *S. caramanica* var. *ilarslanii*, differing in its hairiness, leaf, and floral features as follows (see Table 1): stem glabrous (not puberulent below); basal leaves 10–14 mm (not 30–60 mm), glabrous (not papillose-puberulent), spatulate-ob lanceolate (not linear-lanceolate); calyx 33–40 mm (not 22–30 mm); teeth 2–3 mm (not 5–6 mm); petals cream with green veins (not ivory white with pink veins); anthophore 25–28 mm (not 10–15 mm).

*Silene bitlisensis* is similar to *S. bupleuroides* ssp. *staticifolia* in habit, but clearly differs as follows: subulate bracts (not ovate or long-acuminate), not enclosing the flower buds (as opposed to enclosing the flower buds); calyx 33–40 mm (not 20–28 mm); petals cream (not white); anthophores 25–28 mm (not 10–18 mm).

*Silene bitlisensis* clearly differs from *S. doganii* as follows: herbaceous (not suffrutescent); lower and middle cauline leaves oblanceolate-elliptic (not narrowly oblanceolate-linear), 18–30 × 2–5 mm (not 10–15 × 4–6 mm); anthophore 25–28 mm (not 8–11 mm). Therefore, the plants in Bitlis are regarded as a species new to science.

#### ACKNOWLEDGEMENTS

The authors thank the curators of KNYA, GAZI, and ANK, who allowed us to study their *Silene* specimens. They also thank the following: Professor Dr Hayri Duman and Professor Dr Zeki Aytaç for checking the specimens of *S. bitlisensis*; Associate Professor Dr Ahmet Duran for writing the Latin diagnosis; and TÜBİTAK (project no: TBAG-1926) for financial support.

#### REFERENCES

- Akpulat AH, Çelik N. 2007.** A new subspecies of *Astragalus* (Section *Caprini* DC. Fabaceae) from Turkey. *Botanical Journal of the Linnean Society* **155**: 227–230.
- Aytaç Z. 1998.** A new species of *Silene* (Caryophyllaceae) from Anatolia (Turkey). *Thaiszia Journal of Botany* **8**: 7–11.
- Aytaç Z, Duman H. 2004.** Six new taxa (Caryophyllaceae) from Turkey. *Annales Botanici Fennici* **41**: 213–221.
- Çelik N, Askin HA, Dönmez E. 2007.** A new species of *Physoptychis* (Brassicaceae) from central Anatolia, Turkey. *Botanical Journal of the Linnean Society* **154**: 393–396.
- Chater AO, Walters SM. 1964.** *Silene* L. In: Tutin TG, Heywood VH, Burges NA, Valentine DH, Walters SM, Webb DA, eds. *Flora Europaea*, Vol. 1. Cambridge: Cambridge University Press, 158–181.
- Coode MJE, Cullen J. 1967.** *Silene* L. In: Davis PH, ed. *Flora of Turkey and the East Aegean Islands*, Vol. 2. Edinburgh: Edinburgh University Press, 179–242.
- Davis PH, Mill RR, Tan K. 1988.** *Silene* L. In: Davis PH, Mill RR, Tan K, eds. *Flora of Turkey and the East Aegean Islands*, Vol. 10 (Suppl.). Edinburgh: Edinburgh University Press, 76–81.
- Deniz İG, Düşen OD. 2004.** *Silene sumbuliana* (Caryophyllaceae), a new species from SW Anatolia, Turkey. *Annales Botanici Fennici* **41**: 293–296.
- Doğan M, Akaydin G. 2007.** Synopsis of Turkish *Acantholimon* Boiss. (Plumbaginaceae). *Botanical Journal of the Linnean Society* **154**: 397–419.
- Dönmez AA. 2007.** Taxonomic notes on the genus *Crataegus* (Rosaceae) in Turkey. *Botanical Journal of the Linnean Society* **155**: 231–240.
- Duran A, Menemen Y. 2003.** A new species of *Silene* (Caryophyllaceae) from South Anatolia, Turkey. *Botanical Journal of the Linnean Society* **143**: 109–113.
- Greuter W. 1995.** *Silene* L. (Caryophyllaceae) in Greece: a subgeneric and sectional classification. *Taxon* **44**: 543–581.
- Greuter W. 1997.** *Silene* L. In: Sitrid A, Tan K, eds. *Flora Hellenica*, Vol. 1. Koenigstein: Koeltz Scientific Books, 239–323.
- IUCN. 2001.** *IUCN red list categories*, Version 3.1. Gland/Cambridge: IUCN Species Survival Commission.
- Meikle RD. 1977.** *Silene* L. In: Meikle RD, ed. *Flora of Cyprus*, Vol. 1. Kew: Bentham-Moxon Trust and Royal Botanic Garden, 224–252.
- Sağiroğlu M, Duman H. 2007.** *Ferula mervynii* (Apiaceae), a distinct new species from north-east Anatolia, Turkey. *Botanical Journal of the Linnean Society* **153**: 357–362.
- Täckholm V. 1974.** *Student's flora of Egypt*. Cairo: Cairo University, 83–87.
- Tan K, Vural M. 2000.** *Silene* L. In: Güner A, Özhatay N, Ekim T, Başer KHC, eds. *Flora of Turkey and the East Aegean Islands*, Vol. 11 (Suppl.). Edinburgh: Edinburgh University Press, 50–53.
- Uysal T, Ertuğrul K, Dural H, Küçüködük M. 2007.** *Muscari turcicum* (Liliaceae/Hyacinthaceae), a new species from south Anatolia, Turkey. *Botanical Journal of the Linnean Society* **154**: 233–236.
- Vural M, Adıgüzel N. 1996.** Türkiye Florasıyla ilgili notlar II = *Silene cserei* subsp. *aeoniopsis*, *Silene argaea* ve *Silene balansae* (Caryophyllaceae). *Ot Sistematiği Botanik Dergisi* **2**: 93–98.
- Vural M, Dönmez AA. 2002.** Two new taxa of *Silene* (Caryophyllaceae) from Turkey. *Annales Botanici Fennici* **39**: 153–158.
- Zohary M. 1966a.** *Silene* L. In: Zohary M, ed. *Flora Palaestina (Text)*. Jerusalem: Israel Academy of Sciences and Humanities, 81–100.
- Zohary M. 1966b.** *Silene* L. In: Zohary M, ed. *Flora Palaestina (Plates)*. Jerusalem: Israel Academy of Sciences and Humanities, 98–133.
